# Supplementary material for: A Phase I Study of LY3009120, a Pan-RAF Inhibitor, in Patients with Advanced or Metastatic Cancer
Source: Oxford University Press journal article supplement (doi:10.1158/1535-7163.mct-19-0681), 2019-10-23
Supplement: 15357163mct190681-sup-225359_2_supp_5821157_pz0y70.docx [file 15357163mct190681-sup-225359_2_supp_5821157_pz0y70.docx]

**Supplementary Figure S2. Pharmacodynamic Biomarkers (IHC for Ki-67, p27 and p-ERK)**

Supplementary Figure S2 shows two cases of patients treated at the RP2D. IHC at Clarient for p-ERK, p27 and Ki-67 were assessed for PD effect using monoclonal rabbit phospho-p44/42 MAPK (ERK1/2), 20G11 Clone; monoclonal mouse anti-Ki67, MIB-1 clone; and monoclonal mouse anti-p27, SX53G8 clone. In (A), the patient is a 56-year old female patient with rectal neuroendocrine cancer who is *KRAS* and *BRAF* wild-type. No differences in staining for the 3 biomarkers were observed when baseline and Day 28 samples were compared. In (B), the patient is a 26-year old male patient with hepatocellular carcinoma with unknown mutational status. No differences in staining for Ki-67 or p27 were observed when baseline and Day 28 samples were compared. The p-ERK staining is poor quality and not interpretable.

Abbreviations: IHC, immunohistochemistry; PD, pharmacodynamics; RP2D, recommended phase 2 dose

1. **Patient with Rectal Neuroendocrine cancer who is KRAS and BRAF wild-type.**

**
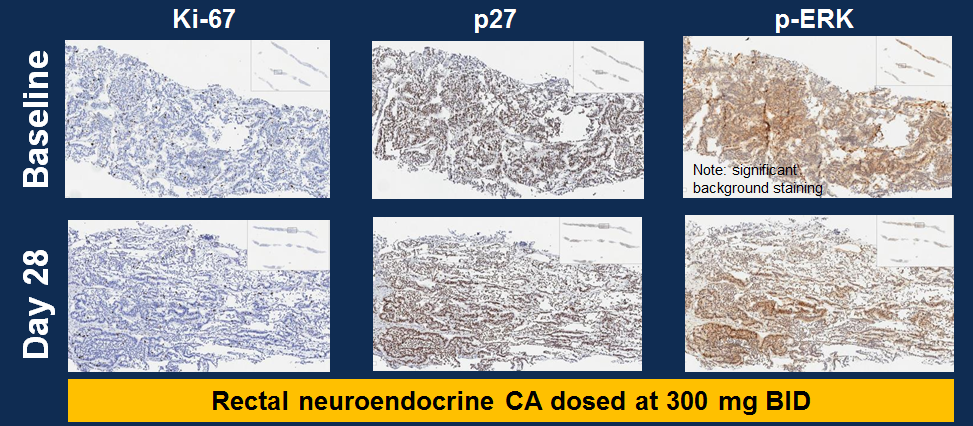
**

**B) Patient With Hepatocellular Carcinoma With Unknown Mutational Status**

**
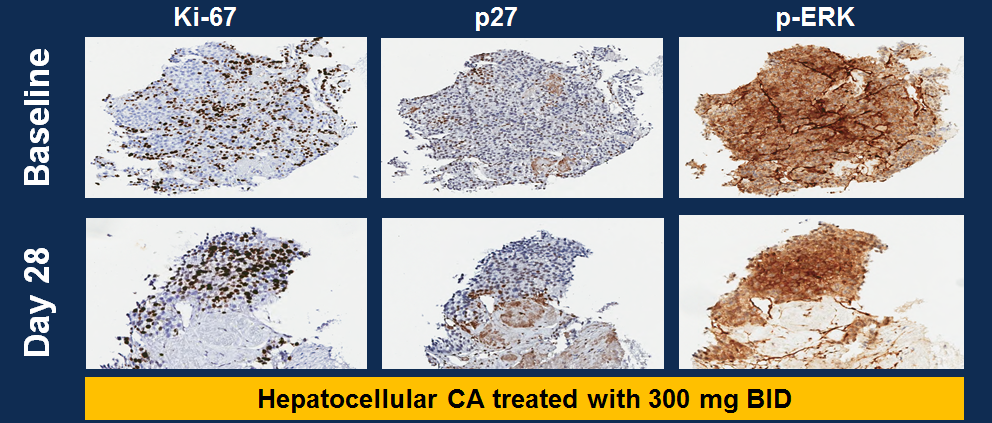
**
